# Supplementary material for: Cross-sectional study of the effects of self-efficacy on fatigue and pain interference in black women with systemic lupus erythematosus: the role of depression, age and education
Source: PubMed Central journal article supplement — Lupus Sci Med. 2022 Feb 11;9(1):e000566. doi: 10.1136/lupus-2021-000566 (PMC8845307; doi:10.1136/lupus-2021-000566), 2022-02-11
Supplement: lupus-2021-000566supp001.pdf [file lupus-2021-000566supp001.pdf]

## Supplemental Material

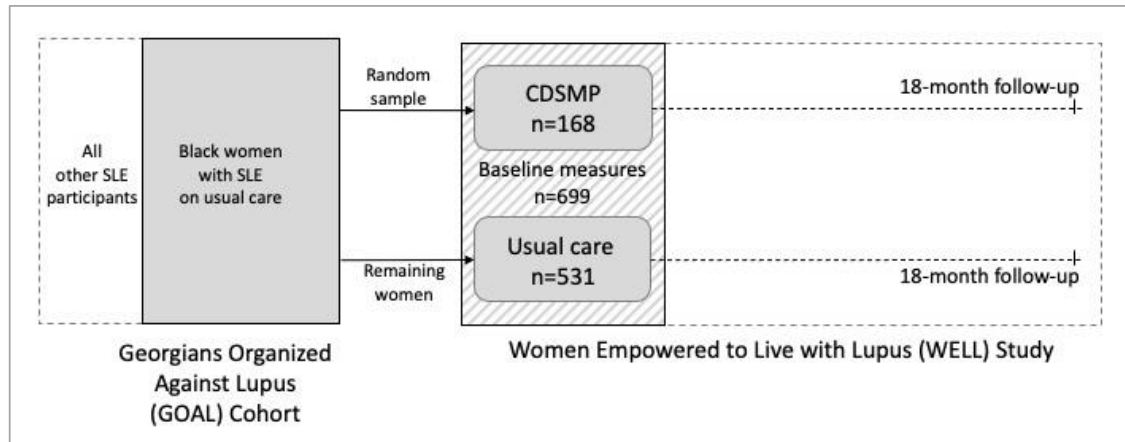

**Supplemental Figure 1.** Overview of the study design. The WELL Study is a two-group longitudinal cohort of Black women with SLE nested within the GOAL cohort. The current study is a cross-sectional analysis of baseline measures among 699 Black women (168 who participated in the Chronic Disease Self-management Program [CDSMP] and 531 on usual care), represented by the gray-line patterned rectangle in the center of the figure. A more comprehensive description of the WELL design and participants' characteristics can be found in <https://lupus.bmj.com/content/lupusscimed/7/1/e000391.full.pdf>.

**Supplemental Table 1. Description of the WELL Study Population**

| Category                       | Measure                                         | Overall (n=699) |             |
|--------------------------------|-------------------------------------------------|-----------------|-------------|
|                                |                                                 | Missing values  | Statistics  |
| Socio-demographics             | Age (years), mean (SD)                          | 0               | 47.9 (13.7) |
|                                | Age group (years), n (%)                        | 0               |             |
|                                | 18-34                                           |                 | 143 (20.5)  |
|                                | 35-54                                           |                 | 329 (47.1)  |
|                                | 55+                                             |                 | 227 (32.5)  |
|                                | Educational attainment, n (%)                   | 1               |             |
|                                | High school or less                             |                 | 261 (37.4)  |
|                                | Some college                                    |                 | 226 (32.4)  |
|                                | Bachelor degree or above                        |                 | 211 (30.2)  |
|                                | Work status, n (%)                              | 6               |             |
|                                | Employed (full- or part-time)                   |                 | 249 (35.9)  |
|                                | Out of labor force                              |                 | 142 (20.5)  |
|                                | Unemployed or disabled                          |                 | 302 (43.6)  |
|                                | Insurance, n (%)                                | 1               |             |
| No Insurance                   |                                                 | 87 (12.5)       |             |
| Federal Insurance              |                                                 | 391 (56.0)      |             |
| Private Insurance              |                                                 | 220 (31.5)      |             |
| Disease Duration & Severity    | Disease duration (years), mean (SD)             | 0               | 15.6 (10.3) |
|                                | Disease activity (SLAQ score), mean (SD)        | 3               | 15.1 (8.7)  |
|                                | Organ damage (SA-BILD score), mean (SD)         | 3               | 2.6 (2.5)   |
| Health-related Quality of Life | Depression severity, n (%)                      | 6               |             |
|                                | None                                            |                 | 358 (51.7)  |
|                                | Mild                                            |                 | 185 (26.7)  |
|                                | Moderate/severe                                 |                 | 150 (21.6)  |
|                                | Fatigue, mean (SD)                              | 8               | 57.8 (11.0) |
| Pain interference, mean (SD)   | 5                                               | 58.0 (9.9)      |             |
| Self-efficacy                  | To manage symptoms, mean (SD)                   | 6               | 48.0 (8.5)  |
|                                | To manage medications and treatments, mean (SD) | 6               | 46.1 (9.2)  |

**Supplemental Table 2. Combined Effect of Self-efficacy and either Depression, Age, or Educational Attainment on the Adjusted Slope of Fatigue**

| <i>Self-efficacy to Manage Symptoms by Depression</i>                            |                |         |                                   |                       |              |
|----------------------------------------------------------------------------------|----------------|---------|-----------------------------------|-----------------------|--------------|
| R <sup>2</sup> =0.45; Mean Square Error =67.6; P-value for the interaction=0.04  |                |         |                                   |                       |              |
| Adjusted Slope*                                                                  |                |         | Slope Difference                  |                       |              |
| Depression Severity                                                              | Slope (±SE)    | P value | Depression Severity Comparison    | Difference (±SE)      | P value      |
| 1. None                                                                          | -0.330 ± 0.056 | <0.001  | 2 vs. 1                           | 0.036 ± 0.102         | 0.7          |
| 2. Mild                                                                          | -0.294 ± 0.087 | <0.001  | <b>3 vs. 1</b>                    | <b>0.267 ± 0.106</b>  | <b>0.01</b>  |
| 3. Moderate/severe                                                               | -0.063 ± 0.091 | 0.5     | 3 vs. 2                           | 0.231 ± 0.126         | 0.07         |
| <i>Self-efficacy to Manage Symptoms by Age</i>                                   |                |         |                                   |                       |              |
| R <sup>2</sup> =0.46; Mean Square Error =65.9; P-value of the interaction=0.2    |                |         |                                   |                       |              |
| Adjusted Slope**                                                                 |                |         | Slope Difference                  |                       |              |
| Age Group                                                                        | Slope (±SE)    | P value | Age Group Comparison              | Difference (±SE)      | P value      |
| 1. 18-34                                                                         | -0.117 ± 0.079 | 0.1     | 2 vs. 1                           | -0.146 ± 0.094        | 0.1          |
| 2. 35-54                                                                         | -0.263 ± 0.060 | <0.001  | 3 vs. 1                           | -0.159 ± 0.101        | 0.1          |
| 3. 55+                                                                           | -0.276 ± 0.069 | <0.001  | 3 vs. 2                           | -0.013 ± 0.087        | 0.9          |
| <i>Self-efficacy to Manage Symptoms by Education</i>                             |                |         |                                   |                       |              |
| R <sup>2</sup> =0.46; Mean Square Error =65.7; P-value of the interaction=0.05   |                |         |                                   |                       |              |
| Adjusted Slope***                                                                |                |         | Slope Difference                  |                       |              |
| Educational Attainment                                                           | Slope (±SE)    | P value | Educational Attainment Comparison | Difference (±SE)      | P value      |
| 1. High school or less                                                           | -0.214 ± 0.060 | <0.001  | 2 vs. 1                           | 0.062 ± 0.087         | 0.5          |
| 2. Some college                                                                  | -0.152 ± 0.069 | 0.03    | 3 vs. 1                           | -0.174 ± 0.094        | 0.06         |
| 3. Bachelor degree or above                                                      | -0.388 ± 0.078 | <0.001  | <b>3 vs. 2</b>                    | <b>-0.235 ± 0.099</b> | <b>0.02</b>  |
| <i>Self-efficacy to Manage Medications and Treatments by Depression</i>          |                |         |                                   |                       |              |
| R <sup>2</sup> =0.42; Mean Square Error =70.8; P-value for the interaction=0.009 |                |         |                                   |                       |              |
| Adjusted Slope^                                                                  |                |         | Slope Difference                  |                       |              |
| Depression Severity                                                              | Slope (±SE)    | P value | Depression Severity Comparison    | Difference (±SE)      | P value      |
| 1. None                                                                          | -0.208 ± 0.053 | <0.001  | 2 vs. 1                           | 0.166 ± 0.090         | 0.07         |
| 2. Mild                                                                          | -0.042 ± 0.073 | 0.6     | <b>3 vs. 1</b>                    | <b>0.268 ± 0.091</b>  | <b>0.003</b> |
| 3. Moderate/severe                                                               | 0.060 ± 0.073  | 0.4     | 3 vs. 2                           | 0.102 ± 0.104         | 0.3          |
| <i>Self-efficacy to Manage Medications and Treatments by Age</i>                 |                |         |                                   |                       |              |
| R <sup>2</sup> =0.43; Mean Square Error =69.1; P-value of the interaction=0.6    |                |         |                                   |                       |              |
| Adjusted Slope^^                                                                 |                |         | Slope Difference                  |                       |              |
| Age Group                                                                        | Slope (±SE)    | P value | Age Group Comparison              | Difference (±SE)      | P value      |
| 1. 18-34                                                                         | -0.008 ± 0.069 | 0.9     | 2 vs. 1                           | -0.080 ± 0.085        | 0.4          |
| 2. 35-54                                                                         | -0.088 ± 0.054 | 0.1     | 3 vs. 1                           | -0.091 ± 0.096        | 0.3          |
| 3. 55+                                                                           | -0.099 ± 0.069 | 0.2     | 3 vs. 2                           | -0.011 ± 0.086        | 0.9          |
| <i>Self-efficacy to Manage Medications and Treatments by Education</i>           |                |         |                                   |                       |              |
| R <sup>2</sup> =0.44; Mean Square Error =68.6; P-value of the interaction=0.06   |                |         |                                   |                       |              |
| Adjusted Slope^^^                                                                |                |         | Slope Difference                  |                       |              |
| Educational Attainment                                                           | Slope (±SE)    | P value | Educational Attainment Comparison | Difference (±SE)      | P value      |
| 1. High school or less                                                           | -0.117 ± 0.056 | 0.04    | <b>2 vs. 1</b>                    | <b>0.166 ± 0.083</b>  | <b>0.05</b>  |
| 2. Some college                                                                  | 0.048 ± 0.063  | 0.4     | 3 vs. 1                           | -0.029 ± 0.087        | 0.7          |
| 3. Bachelor degree or above                                                      | -0.147 ± 0.070 | 0.04    | <b>3 vs. 2</b>                    | <b>-0.195 ± 0.093</b> | <b>0.04</b>  |

\*Adjusted for symptoms self-efficacy, age, education, work status, insurance, disease duration, disease activity (SLAQ), and organ damage (SA-BILD). \*\*Adjusted for symptoms self-efficacy, depression, education, work status, insurance, disease duration, disease activity (SLAQ), and organ damage (SA-BILD). \*\*\*Adjusted for symptoms self-efficacy, depression, age, work status, insurance, disease duration, disease activity (SLAQ), and organ damage (SA-BILD). ^Adjusted for treatment self-efficacy, age, education, work status, insurance, disease duration, disease activity (SLAQ), and organ damage (SA-BILD). ^^Adjusted for treatment self-efficacy, depression, education, work status, insurance, disease duration, disease activity (SLAQ), and organ damage (SA-BILD). ^^^Adjusted for symptoms self-efficacy, depression, age, work status, insurance, disease duration, disease activity (SLAQ), and organ damage (SA-BILD). Abbreviations: SE=standard error; HS=high school.

**Supplemental Table 3. Combined Effect of Self-efficacy and either Depression, Age, or Educational Attainment on the Adjusted Slope of Pain Interference**

| <i>Self-efficacy to Manage Symptoms by Depression</i>                                |                |         |                                   |                       |              |
|--------------------------------------------------------------------------------------|----------------|---------|-----------------------------------|-----------------------|--------------|
| R <sup>2</sup> =0.41; Mean Square Error (MSE)=59.9; P-value for the interaction=0.05 |                |         |                                   |                       |              |
| Adjusted* Slope                                                                      |                |         | Slope Difference                  |                       |              |
| Depression Severity                                                                  | Slope (±SE)    | P value | Depression Severity Comparison    | Difference (±SE)      | P value      |
| 1. None                                                                              | -0.196 ± 0.052 | <0.001  | <b>2 vs. 1</b>                    | <b>0.230 ± 0.096</b>  | <b>0.02</b>  |
| 2. Mild                                                                              | 0.034 ± 0.082  | 0.7     | 3 vs. 1                           | 0.115 ± 0.100         | 0.3          |
| 3. Moderate/severe                                                                   | -0.080 ± 0.086 | 0.4     | 3 vs. 2                           | -0.115 ± 0.118        | 0.3          |
| <i>Self-efficacy to Manage Symptoms by Age</i>                                       |                |         |                                   |                       |              |
| R <sup>2</sup> =0.42; Mean Square Error (MSE)=59.0; P-value of the interaction=0.02  |                |         |                                   |                       |              |
| Adjusted Slope                                                                       |                |         | Slope Difference                  |                       |              |
| Age Group                                                                            | Slope (±SE)    | P value | Age Group Comparison              | Difference (±SE)      | P value      |
| 1. 18-34                                                                             | 0.060 ± 0.074  | 0.4     | 2 vs. 1                           | -0.169 ± 0.088        | 0.06         |
| 2. 35-54                                                                             | -0.109 ± 0.057 | 0.06    | <b>3 vs. 1</b>                    | <b>-0.263 ± 0.096</b> | <b>0.006</b> |
| 3. 55+                                                                               | -0.203 ± 0.065 | 0.002   | 3 vs. 2                           | -0.094 ± 0.083        | 0.3          |
| <i>Self-efficacy to Manage Symptoms by Education</i>                                 |                |         |                                   |                       |              |
| R <sup>2</sup> =0.42; Mean Square Error (MSE)=59.0; P-value of the interaction=0.04  |                |         |                                   |                       |              |
| Adjusted Slope                                                                       |                |         | Slope Difference                  |                       |              |
| Educational Attainment                                                               | Slope (±SE)    | P value | Educational Attainment Comparison | Difference (±SE)      | P value      |
| 1. High school or less                                                               | -0.085 ± 0.057 | 0.1     | 2 vs. 1                           | 0.068 ± 0.082         | 0.4          |
| 2. Some college                                                                      | -0.017 ± 0.065 | 0.8     | 3 vs. 1                           | -0.171 ± 0.089        | 0.06         |
| 3. Bachelor degree or above                                                          | -0.256 ± 0.074 | <0.001  | <b>3 vs. 2</b>                    | <b>-0.239 ± 0.094</b> | <b>0.01</b>  |
| <i>Self-efficacy to Manage Medications and Treatments by Depression</i>              |                |         |                                   |                       |              |
| R <sup>2</sup> =0.40; Mean Square Error (MSE)=60.8; P-value for the interaction=0.06 |                |         |                                   |                       |              |
| Adjusted* Slope                                                                      |                |         | Slope Difference                  |                       |              |
| Depression Severity                                                                  | Slope (±SE)    | P value | Depression Severity Comparison    | Difference (±SE)      | P value      |
| 1. None                                                                              | -0.069 ± 0.049 | 0.2     | <b>2 vs. 1</b>                    | <b>0.187 ± 0.084</b>  | <b>0.03</b>  |
| 2. Mild                                                                              | 0.117 ± 0.068  | 0.08    | 3 vs. 1                           | 0.136 ± 0.084         | 0.1          |
| 3. Moderate/severe                                                                   | 0.066 ± 0.068  | 0.3     | 3 vs. 2                           | -0.051 ± 0.096        | 0.6          |
| <i>Self-efficacy to Manage Medications and Treatments by Age</i>                     |                |         |                                   |                       |              |
| R <sup>2</sup> =0.40; Mean Square Error (MSE)=60.3; P-value of the interaction=0.8   |                |         |                                   |                       |              |
| Adjusted Slope                                                                       |                |         | Slope Difference                  |                       |              |
| Age Group                                                                            | Slope (±SE)    | P value | Age Group Comparison              | Difference (±SE)      | P value      |
| 1. 18-34                                                                             | 0.056 ± 0.064  | 0.4     | 2 vs. 1                           | -0.031 ± 0.079        | 0.7          |
| 2. 35-54                                                                             | 0.026 ± 0.050  | 0.6     | 3 vs. 1                           | -0.053 ± 0.090        | 0.6          |
| 3. 55+                                                                               | 0.003 ± 0.064  | 1.0     | 3 vs. 2                           | -0.022 ± 0.080        | 0.8          |
| <i>Self-efficacy to Manage Medications and Treatments by Education</i>               |                |         |                                   |                       |              |
| R <sup>2</sup> =0.41; Mean Square Error (MSE)=60.0; P-value of the interaction=0.3   |                |         |                                   |                       |              |
| Adjusted Slope                                                                       |                |         | Slope Difference                  |                       |              |
| Educational Attainment                                                               | Slope (±SE)    | P value | Educational Attainment Comparison | Difference (±SE)      | P value      |
| 1. High school or less                                                               | -0.021 ± 0.052 | 0.7     | 2 vs. 1                           | 0.119 ± 0.077         | 0.1          |
| 2. Some college                                                                      | 0.098 ± 0.059  | 0.1     | 3 vs. 1                           | 0.025 ± 0.082         | 0.8          |
| 3. Bachelor degree or above                                                          | 0.004 ± 0.065  | 0.9     | 3 vs. 2                           | -0.094 ± 0.086        | 0.3          |

\*Adjusted for symptoms self-efficacy, age, education, work status, insurance, disease duration, disease activity (SLAQ), and organ damage (SA-BILD). \*\* Adjusted for symptoms self-efficacy, depression, education, work status, insurance, disease duration, disease activity (SLAQ), and organ damage (SA-BILD). \*\*\* Adjusted for symptoms self-efficacy, depression, age, work status, insurance, disease duration, disease activity (SLAQ), and organ damage (SA-BILD). ^Adjusted for treatment self-efficacy, age, education, work status, insurance, disease duration, disease activity (SLAQ), and organ damage (SA-BILD). ^^ Adjusted for treatment self-efficacy, depression, education, work status, insurance, disease duration, disease activity (SLAQ), and organ damage (SA-BILD). ^^^ Adjusted for symptoms self-efficacy, depression, age, disease duration, work status, insurance, SLAQ, and organ damage score. Abbreviations: SE=standard error; HS=high school.

| <b>Supplemental Table 4. Sensitivity Analyses of the Combined Effect of Self-efficacy to Manage Symptoms and Depression on the Adjusted Mean of Fatigue</b>                                                                                                                                                                                                                |                        |                       |                          |         |
|----------------------------------------------------------------------------------------------------------------------------------------------------------------------------------------------------------------------------------------------------------------------------------------------------------------------------------------------------------------------------|------------------------|-----------------------|--------------------------|---------|
| Original Model, adjusted for symptoms self-efficacy <sup>^</sup> , age, education, work status, insurance, disease duration, disease activity (SLAQ), and organ damage (SA-BILD)                                                                                                                                                                                           |                        |                       |                          |         |
| <i>Interaction between Self-efficacy to Manage Symptoms and Depression (P=0.04)</i>                                                                                                                                                                                                                                                                                        |                        |                       |                          |         |
| Depression Severity                                                                                                                                                                                                                                                                                                                                                        | Adjusted Mean (95% CI) | Depression Comparison | Mean Difference (95% CI) | P-value |
| 1. No                                                                                                                                                                                                                                                                                                                                                                      | 55.5 (54.4, 56.6)      | 2 vs. 1               | 3.4 (1.8, 5.0)           | <0.001  |
| 2. Mild                                                                                                                                                                                                                                                                                                                                                                    | 58.9 (57.6, 60.3)      | 3 vs. 1               | 6.8 (4.7, 8.9)           | <0.001  |
| 3. Moderate/severe                                                                                                                                                                                                                                                                                                                                                         | 62.3 (60.5, 64.2)      | 3 vs. 2               | 3.4 (1.3, 5.6)           | 0.002   |
| Model 2, adjusted for symptoms self-efficacy <sup>^</sup> , age, education, work status, insurance, disease duration, disease activity (SLAQ), organ damage (SA-BILD), and steroid use*                                                                                                                                                                                    |                        |                       |                          |         |
| <i>Interaction between Self-efficacy to Manage Symptoms and Depression (P=0.04)</i>                                                                                                                                                                                                                                                                                        |                        |                       |                          |         |
| Depression Severity                                                                                                                                                                                                                                                                                                                                                        | Adjusted Mean (95% CI) | Depression Comparison | Mean Difference (95% CI) | P-value |
| 1. No                                                                                                                                                                                                                                                                                                                                                                      | 55.5 (54.4, 56.7)      | 2 vs. 1               | 3.3 (1.6, 4.9)           | <0.001  |
| 2. Mild                                                                                                                                                                                                                                                                                                                                                                    | 58.8 (57.4, 60.2)      | 3 vs. 1               | 6.7 (4.6, 8.8)           | <0.001  |
| 3. Moderate/severe                                                                                                                                                                                                                                                                                                                                                         | 62.2 (60.3, 64.1)      | 3 vs. 2               | 3.4 (1.2, 5.6)           | 0.002   |
| Model 3, adjusted for symptoms self-efficacy <sup>^</sup> , age, education, work status, insurance, disease duration, disease activity (SLAQ), organ damage (SA-BILD), and steroid dose**                                                                                                                                                                                  |                        |                       |                          |         |
| <i>Interaction between Self-efficacy to Manage Symptoms and Depression (P=0.06)</i>                                                                                                                                                                                                                                                                                        |                        |                       |                          |         |
| Depression Severity                                                                                                                                                                                                                                                                                                                                                        | Adjusted Mean (95% CI) | Depression Comparison | Mean Difference (95% CI) | P-value |
| 1. No                                                                                                                                                                                                                                                                                                                                                                      | 54.9 (53.4, 56.4)      | 2 vs. 1               | 3.3 (1.7, 5.0)           | <0.001  |
| 2. Mild                                                                                                                                                                                                                                                                                                                                                                    | 58.3 (56.5, 60.0)      | 3 vs. 1               | 6.7 (4.5, 8.8)           | <0.001  |
| 3. Moderate/severe                                                                                                                                                                                                                                                                                                                                                         | 61.6 (59.4, 63.7)      | 3 vs. 2               | 3.3 (1.1, 5.5)           | 0.004   |
| Model 4, adjusted for symptoms self-efficacy <sup>^</sup> , age, education, work status, insurance, disease duration, disease activity (SLAQ), organ damage (SA-BILD), and immunosuppressive drugs use*                                                                                                                                                                    |                        |                       |                          |         |
| <i>Interaction between Self-efficacy to Manage Symptoms and Depression (P=0.04)</i>                                                                                                                                                                                                                                                                                        |                        |                       |                          |         |
| Depression Severity                                                                                                                                                                                                                                                                                                                                                        | Adjusted Mean (95% CI) | Depression Comparison | Mean Difference (95% CI) | P-value |
| 1. No                                                                                                                                                                                                                                                                                                                                                                      | 55.5 (54.3, 56.7)      | 2 vs. 1               | 3.5 (1.8, 5.2)           | <0.001  |
| 2. Mild                                                                                                                                                                                                                                                                                                                                                                    | 59.0 (57.5, 60.4)      | 3 vs. 1               | 7.2 (5.0, 9.4)           | <0.001  |
| 3. Moderate/severe                                                                                                                                                                                                                                                                                                                                                         | 62.7 (60.8, 64.6)      | 3 vs. 2               | 3.7 (1.5, 6.0)           | 0.001   |
| Model 5, adjusted for symptoms self-efficacy <sup>^</sup> , age, education, work status, insurance, disease duration, disease activity (SLAQ), organ damage (SA-BILD), steroid and/or immunosuppressive drugs use*                                                                                                                                                         |                        |                       |                          |         |
| <i>Interaction between Self-efficacy to Manage Symptoms and Depression (P=0.04)</i>                                                                                                                                                                                                                                                                                        |                        |                       |                          |         |
| Depression Severity                                                                                                                                                                                                                                                                                                                                                        | Adjusted Mean (95% CI) | Depression Comparison | Mean Difference (95% CI) | P-value |
| 1. No                                                                                                                                                                                                                                                                                                                                                                      | 55.4 (54.2, 56.6)      | 2 vs. 1               | 3.5 (1.8, 5.2)           | <0.001  |
| 2. Mild                                                                                                                                                                                                                                                                                                                                                                    | 58.9 (57.5, 60.3)      | 3 vs. 1               | 7.2 (5.0, 9.4)           | <0.001  |
| 3. Moderate/severe                                                                                                                                                                                                                                                                                                                                                         | 62.6 (60.7, 64.6)      | 3 vs. 2               | 3.7 (1.4, 6.0)           | 0.001   |
| Model 6, adjusted for symptoms self-efficacy <sup>^</sup> , age, education, work status, insurance, disease duration, disease activity (SLAQ), organ damage (SA-BILD), steroid dose** and/or immunosuppressive drugs use*                                                                                                                                                  |                        |                       |                          |         |
| <i>Interaction between Self-efficacy to Manage Symptoms and Depression (P=0.07)</i>                                                                                                                                                                                                                                                                                        |                        |                       |                          |         |
| Depression Severity                                                                                                                                                                                                                                                                                                                                                        | Adjusted Mean (95% CI) | Depression Comparison | Mean Difference (95% CI) | P-value |
| 1. No                                                                                                                                                                                                                                                                                                                                                                      | 54.9 (53.3, 56.4)      | 2 vs. 1               | 3.6 (1.8, 5.3)           | <0.001  |
| 2. Mild                                                                                                                                                                                                                                                                                                                                                                    | 58.4 (56.6, 60.2)      | 3 vs. 1               | 7.1 (4.9, 9.4)           | <0.001  |
| 3. Moderate/severe                                                                                                                                                                                                                                                                                                                                                         | 62.0 (59.8, 64.2)      | 3 vs. 2               | 3.6 (1.3, 5.9)           | 0.003   |
| <sup>^</sup> Symptoms self-efficacy at mean T-score=48.1. * Steroid and immunosuppressive drugs used were categorized as yes/no. ** Steroid dose (prednisone or equivalent) was categorized as: none (0 mg); low (1-15 mg/day); moderate (16-30mg/day); high (>30mg/day). Missing values: for steroids use n=17; for steroid dose n=33; for immunosuppressive drugs n= 44. |                        |                       |                          |         |

| <b>Supplemental Table 5. Sensitivity Analyses of the Combined Effect of Self-efficacy to Manage Symptoms and Depression on the Adjusted Mean of Pain Interference</b>                                                                                                                                                                                                      |                            |                       |                             |             |
|----------------------------------------------------------------------------------------------------------------------------------------------------------------------------------------------------------------------------------------------------------------------------------------------------------------------------------------------------------------------------|----------------------------|-----------------------|-----------------------------|-------------|
| Original Model, adjusted for symptoms self-efficacy <sup>^</sup> , age, education, work status, insurance, disease duration, disease activity (SLAQ), and organ damage (SA-BILD)                                                                                                                                                                                           |                            |                       |                             |             |
| <i>Interaction between Self-efficacy to Manage Symptoms and Depression (P=0.05)</i>                                                                                                                                                                                                                                                                                        |                            |                       |                             |             |
| Depression Severity                                                                                                                                                                                                                                                                                                                                                        | Adjusted Mean*<br>(95% CI) | Depression Comparison | Mean Difference<br>(95% CI) | P-value     |
| 1. No                                                                                                                                                                                                                                                                                                                                                                      | 56.9 (55.8, 57.9)          | 2 vs. 1               | 1.3 (-0.2, 2.8)             | 0.09        |
| 2. Mild                                                                                                                                                                                                                                                                                                                                                                    | 58.2 (56.9, 59.4)          | <b>3 vs. 1</b>        | <b>2.0 (0.0, 4.0)</b>       | <b>0.04</b> |
| 3. Moderate/severe                                                                                                                                                                                                                                                                                                                                                         | 58.9 (57.1, 60.6)          | 3 vs. 2               | 0.7 (-1.3, 2.7)             | 0.5         |
| Model 2, adjusted for symptoms self-efficacy <sup>^</sup> , age, education, work status, insurance, disease duration, disease activity (SLAQ), organ damage (SA-BILD), and steroid use*                                                                                                                                                                                    |                            |                       |                             |             |
| <i>Interaction between Self-efficacy to Manage Symptoms and Depression (P=0.07)</i>                                                                                                                                                                                                                                                                                        |                            |                       |                             |             |
| Depression Severity                                                                                                                                                                                                                                                                                                                                                        | Adjusted Mean<br>(95% CI)  | Depression Comparison | Mean Difference<br>(95% CI) | P-value     |
| 1. No                                                                                                                                                                                                                                                                                                                                                                      | 56.8 (55.7, 57.9)          | 2 vs. 1               | 1.4 (-0.2, 2.9)             | 0.08        |
| 2. Mild                                                                                                                                                                                                                                                                                                                                                                    | 58.2 (56.9, 59.5)          | 3 vs. 1               | 1.9 (-0.1, 4.0)             | 0.06        |
| 3. Moderate/severe                                                                                                                                                                                                                                                                                                                                                         | 58.8 (57.0, 60.5)          | 3 vs. 2               | 0.6 (-1.5, 2.6)             | 0.6         |
| Model 3, adjusted for symptoms self-efficacy <sup>^</sup> , age, education, work status, insurance, disease duration, disease activity (SLAQ), organ damage (SA-BILD), and steroid dose**                                                                                                                                                                                  |                            |                       |                             |             |
| <i>Interaction between Self-efficacy to Manage Symptoms and Depression (P=0.05)</i>                                                                                                                                                                                                                                                                                        |                            |                       |                             |             |
| Depression Severity                                                                                                                                                                                                                                                                                                                                                        | Adjusted Mean<br>(95% CI)  | Depression Comparison | Mean Difference<br>(95% CI) | P-value     |
| 1. No                                                                                                                                                                                                                                                                                                                                                                      | 56.9 (55.5, 58.3)          | <b>2 vs. 1</b>        | <b>1.6 (0.0, 3.2)</b>       | <b>0.05</b> |
| 2. Mild                                                                                                                                                                                                                                                                                                                                                                    | 58.5 (56.9, 60.1)          | 3 vs. 1               | 1.9 (-0.1, 3.9)             | 0.07        |
| 3. Moderate/severe                                                                                                                                                                                                                                                                                                                                                         | 58.8 (56.8, 60.8)          | 3 vs. 2               | 0.3 (-1.8, 2.4)             | 0.8         |
| Model 4, adjusted for symptoms self-efficacy <sup>^</sup> , age, education, work status, insurance, disease duration, disease activity (SLAQ), organ damage (SA-BILD), and immunosuppressive drugs use*                                                                                                                                                                    |                            |                       |                             |             |
| <i>Interaction between Self-efficacy to Manage Symptoms and Depression (P=0.04)</i>                                                                                                                                                                                                                                                                                        |                            |                       |                             |             |
| Depression Severity                                                                                                                                                                                                                                                                                                                                                        | Adjusted Mean<br>(95% CI)  | Depression Comparison | Mean Difference<br>(95% CI) | P-value     |
| 1. No                                                                                                                                                                                                                                                                                                                                                                      | 56.9 (55.8, 58.1)          | 2 vs. 1               | 1.3 (-0.3, 2.9)             | 0.11        |
| 2. Mild                                                                                                                                                                                                                                                                                                                                                                    | 58.3 (56.9, 59.6)          | <b>3 vs. 1</b>        | <b>2.1 (-0.0, 4.2)</b>      | <b>0.05</b> |
| 3. Moderate/severe                                                                                                                                                                                                                                                                                                                                                         | 59.0 (57.2, 60.8)          | 3 vs. 2               | 0.8 (-1.4, 2.9)             | 0.5         |
| Model 5, adjusted for symptoms self-efficacy <sup>^</sup> , age, education, work status, insurance, disease duration, disease activity (SLAQ), organ damage (SA-BILD), steroid and/or immunosuppressive drugs use*                                                                                                                                                         |                            |                       |                             |             |
| <i>Interaction between Self-efficacy to Manage Symptoms and Depression (P=0.04)</i>                                                                                                                                                                                                                                                                                        |                            |                       |                             |             |
| Depression Severity                                                                                                                                                                                                                                                                                                                                                        | Adjusted Mean<br>(95% CI)  | Depression Comparison | Mean Difference<br>(95% CI) | P-value     |
| 1. No                                                                                                                                                                                                                                                                                                                                                                      | 56.8 (55.7, 58.0)          | 2 vs. 1               | 1.5 (-0.1, 3.1)             | 0.08        |
| 2. Mild                                                                                                                                                                                                                                                                                                                                                                    | 58.3 (57.0, 59.7)          | <b>3 vs. 1</b>        | <b>2.1 (-0.0, 4.2)</b>      | <b>0.05</b> |
| 3. Moderate/severe                                                                                                                                                                                                                                                                                                                                                         | 58.9 (57.1, 60.7)          | 3 vs. 2               | 0.6 (-1.5, 2.7)             | 0.6         |
| Model 6, adjusted for symptoms self-efficacy <sup>^</sup> , age, education, work status, insurance, disease duration, disease activity (SLAQ), organ damage (SA-BILD), steroid dose** and/or immunosuppressive drugs use*                                                                                                                                                  |                            |                       |                             |             |
| <i>Interaction between Self-efficacy to Manage Symptoms and Depression (P=0.03)</i>                                                                                                                                                                                                                                                                                        |                            |                       |                             |             |
| Depression Severity                                                                                                                                                                                                                                                                                                                                                        | Adjusted Mean<br>(95% CI)  | Depression Comparison | Mean Difference<br>(95% CI) | P-value     |
| 1. No                                                                                                                                                                                                                                                                                                                                                                      | 57.0 (55.5, 58.5)          | <b>2 vs. 1</b>        | <b>1.7 (0.1, 3.4)</b>       | <b>0.04</b> |
| 2. Mild                                                                                                                                                                                                                                                                                                                                                                    | 58.7 (57.0, 60.4)          | 3 vs. 1               | 2.0 (-0.1, 4.1)             | 0.07        |
| 3. Moderate/severe                                                                                                                                                                                                                                                                                                                                                         | 59.0 (56.9, 61.0)          | 3 vs. 2               | 0.3 (-1.9, 2.4)             | 0.8         |
| <sup>^</sup> Symptoms self-efficacy at mean T-score=48.1. * Steroid and immunosuppressive drugs used were categorized as yes/no. ** Steroid dose (prednisone or equivalent) was categorized as: none (0 mg); low (1-15 mg/day); moderate (16-30mg/day); high (>30mg/day). Missing values: for steroids use n=17; for steroid dose n=33; for immunosuppressive drugs n= 44. |                            |                       |                             |             |
